# Supplementary material for: Zika Virus Infection Damages the Testes in Pubertal Common Squirrel Monkeys (Saimiri collinsi)
Source: MDPI journal article supplement (doi:10.3390/v15030615), 2023-02-23

## Supplementary Material

Table S1. Mean  $\pm$  SD of testosterone levels (ng/dl) in the fecal extract of squirrel monkey (*Saimiri collinsi*): pre inoculation, acute phase, and convalescent phase of Zika virus experimental infection. Values after logarithmic transformation.

|                | Pre inoculation                   | Acute Phase                       | Convalescent Phase                |
|----------------|-----------------------------------|-----------------------------------|-----------------------------------|
| Group          | Day -5 to -1                      | Day 0 to 9                        | Day 10 to 21                      |
| G1: Uninfected | 2,6450 $\pm$ 0,2608 <sup>Aa</sup> | 2,5954 $\pm$ 0,2119 <sup>Aa</sup> | 2,7294 $\pm$ 0,2297 <sup>Aa</sup> |
| G2: Infected   | 2,7110 $\pm$ 0,2213 <sup>Aa</sup> | 2,4857 $\pm$ 0,3232 <sup>Ab</sup> | 2,6620 $\pm$ 0,1582 <sup>Aa</sup> |

<sup>A-B</sup> Different uppercase letters between rows indicate statistical difference between groups in the same stage of infection ( $p < 0.05$ ).

<sup>a-b</sup> Different lowercase letters between columns indicate statistical difference between stages in the same experimental group ( $p < 0.05$ ).

Table S2. Mean  $\pm$  SD of testicular biometry of the squirrel monkey (*Saimiri collinsi*): acute and convalescent phase of Zika virus experimental infection. Values after logarithmic transformation.

|                                               |                | Acute Phase                        | Convalescent Phase                 |
|-----------------------------------------------|----------------|------------------------------------|------------------------------------|
|                                               |                | Day 0, 3, 5 e 7                    | Day 10, 14 e 21                    |
| <b>Testicular<br/>Volume (cm<sup>3</sup>)</b> | G1: Uninfected | -0,092 $\pm$ 0,154 <sup>Aa</sup>   | -0,077 $\pm$ 0,069 <sup>Aa</sup>   |
|                                               | G2: Infected   | -0,2655 $\pm$ 0,0730 <sup>Ba</sup> | -0,3385 $\pm$ 0,0294 <sup>Bb</sup> |
| <b>Gonadosomatic<br/>Index (%)</b>            | G1: Uninfected | -0,845 $\pm$ 0,169 <sup>Aa</sup>   | -0,822 $\pm$ 0,159 <sup>Aa</sup>   |
|                                               | G2: Infected   | -1,0074 $\pm$ 0,0949 <sup>Ba</sup> | -1,0812 $\pm$ 0,0402 <sup>Bb</sup> |
| <b>Body Weight (g)</b>                        | G1: Uninfected | 2,7722 $\pm$ 0,0227 <sup>Aa</sup>  | 2,7640 $\pm$ 0,0115 <sup>Aa</sup>  |
|                                               | G2: Infected   | 2,7614 $\pm$ 0,0393 <sup>Aa</sup>  | -2,7623 $\pm$ 0,0282 <sup>Aa</sup> |

<sup>A-B</sup> Different uppercase letters between rows indicate statistical difference between groups in the same stage of infection ( $p < 0.05$ ).

<sup>a-b</sup> Different lowercase letters between columns indicate statistical difference between stages in the same experimental group ( $p < 0.05$ ).

Figure S1. Group evaluation, daily data: (A) Testosterone, (B) Testicular Volume, (C) Gonadosomatic Index, and (D) Body weight. Mean and min-max values. The infection stages are represented by the periods: pre inoculation (day -5 to -1), acute phase (day 0 to 9), and convalescent phase (day 10 to 21).

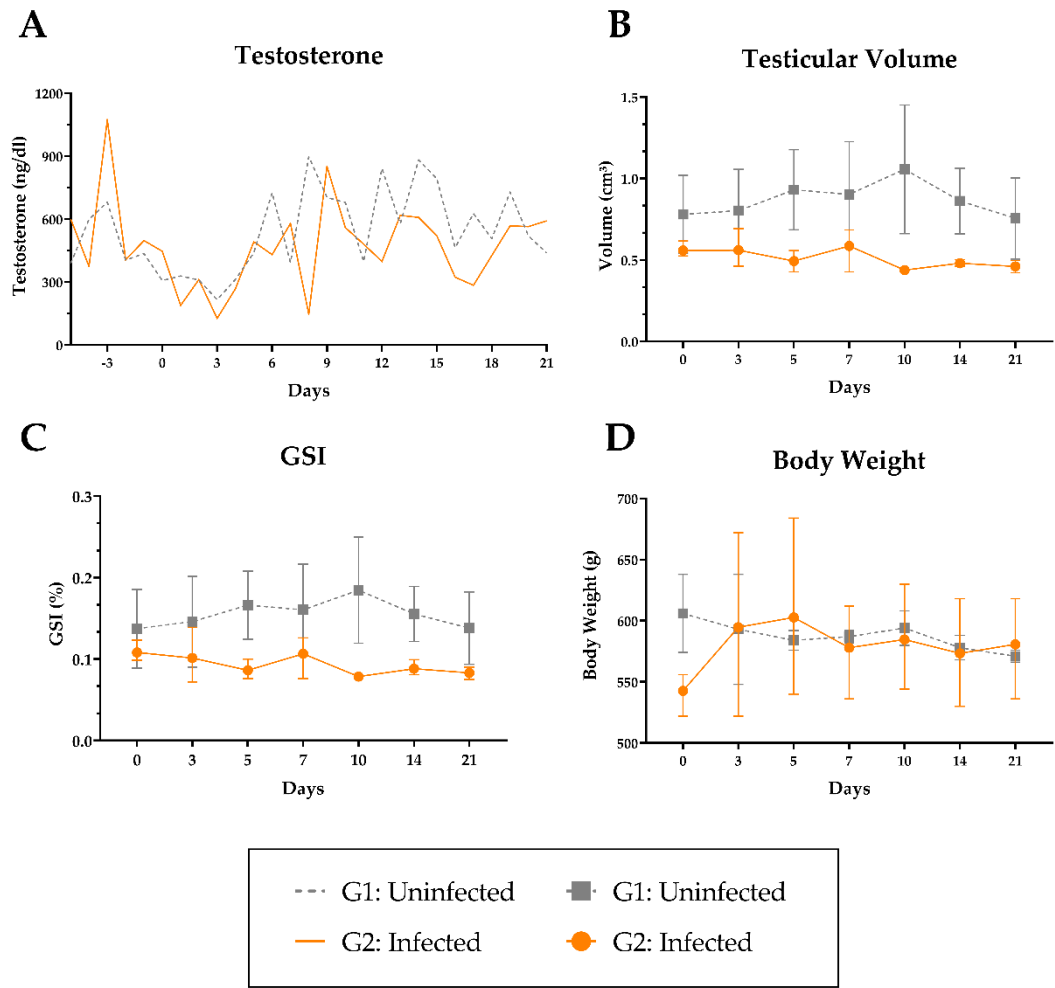

Supplement: s1 [file s1]
